# Supplementary material for: Recyclable fluorimetric and colorimetric mercury-specific sensor using porphyrin-functionalized Au@SiO2 core/shell nanoparticles
Source: Royal Society of Chemistry journal article supplement (doi:10.1039/c0an00137f), 2010-01-01
Supplement: c0an00137f.pdf [file c0an00137f.pdf]

**【Electronic Supplementary Information】**

Recyclable fluorimetric and colorimetric mercury-  
specific sensor by using porphyrin-functionalized  
 $\text{Au}@\text{SiO}_2$  core/shell nanoparticles

*Youngje Cho, Shim Sung Lee and Jong Hwa Jung\**

Department of Chemistry and Research Institute of Natural Sciences and Environmental  
Biotechnology National Core Research Center, Gyeongsang National University, Jinju 660-  
701, Korea

\* To whom correspondence should be addressed. E-mail: [jonghwa@gnu.ac.kr](mailto:jonghwa@gnu.ac.kr)

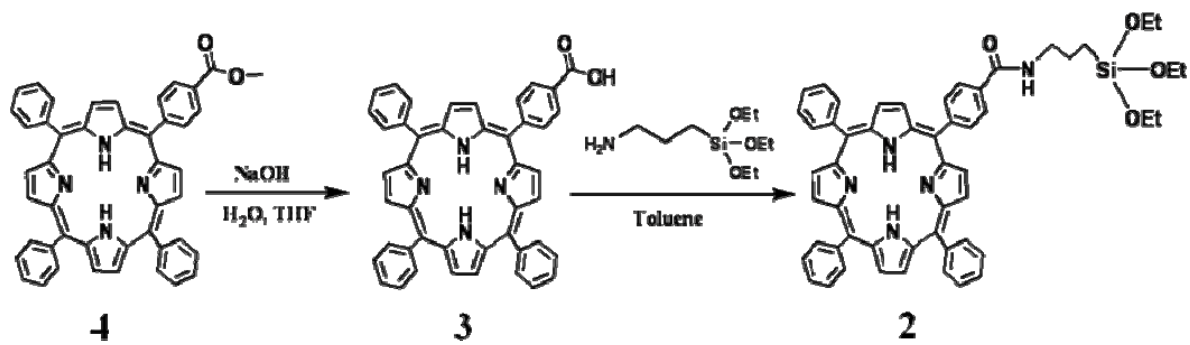

Scheme S1. Synthetic route of the receptor 2.

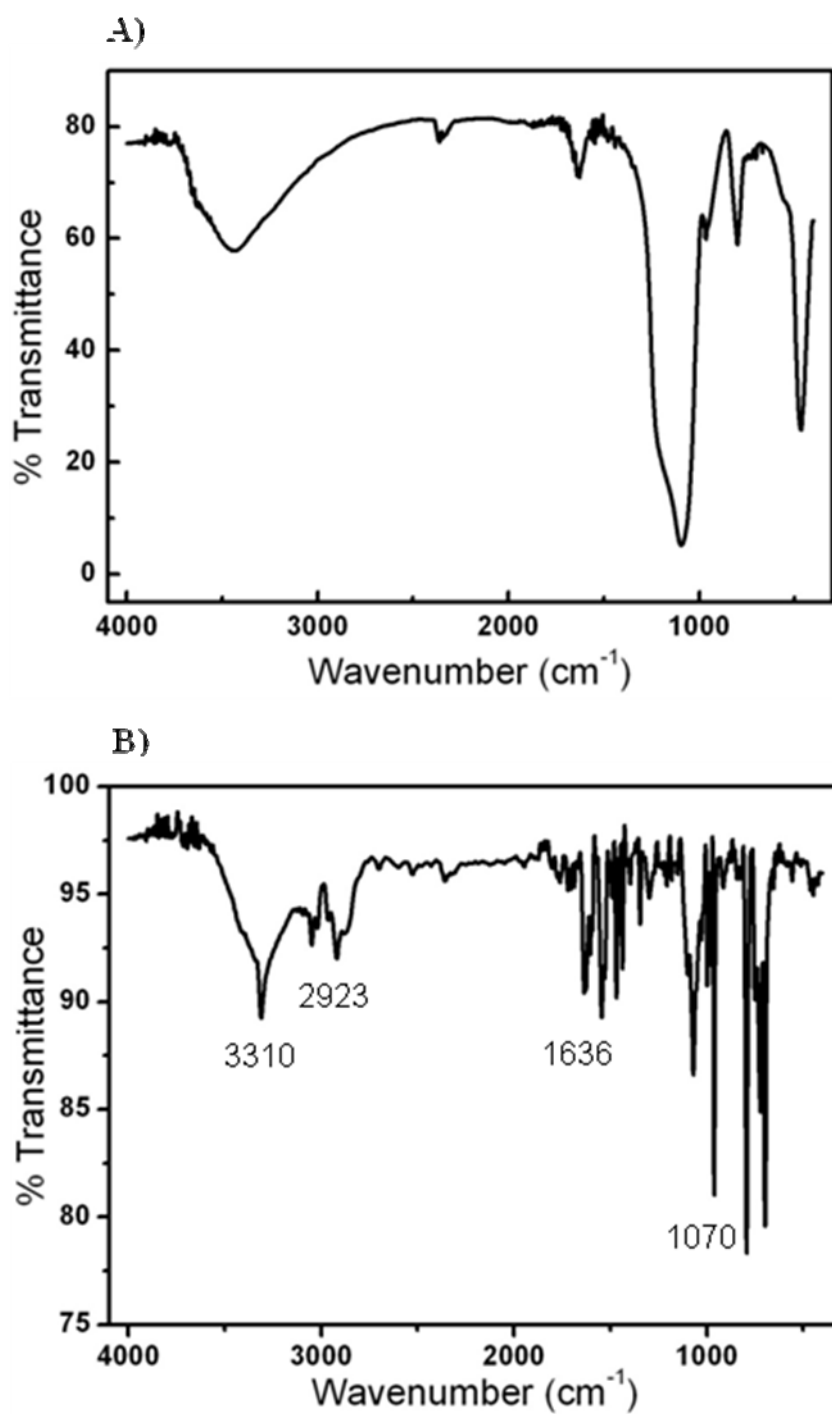

**Fig. S1** Infrared spectra of (A) Au@SiO<sub>2</sub> and (B) 1.

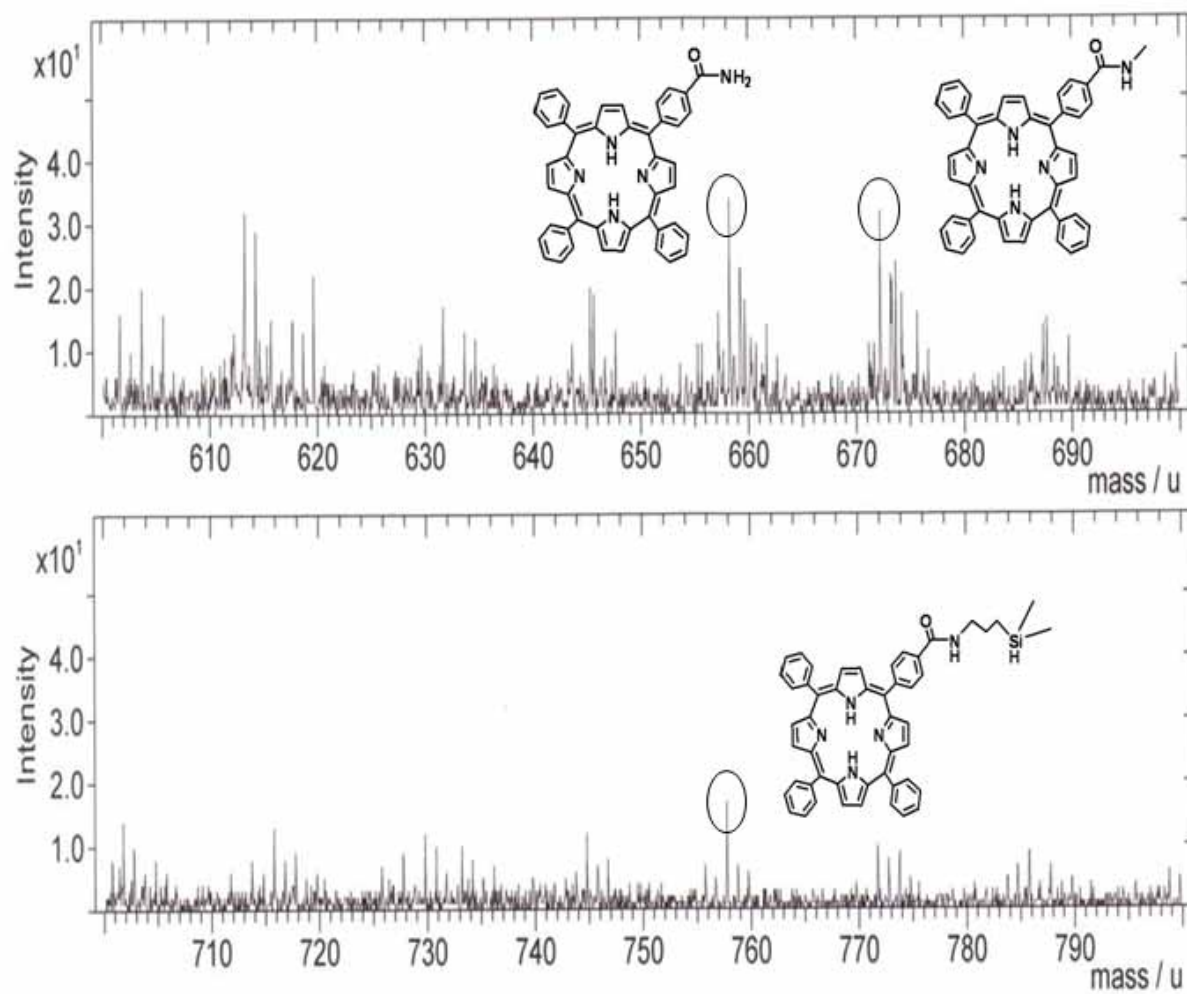

**Fig. S2** TOF-SIMS spectra of **1**.

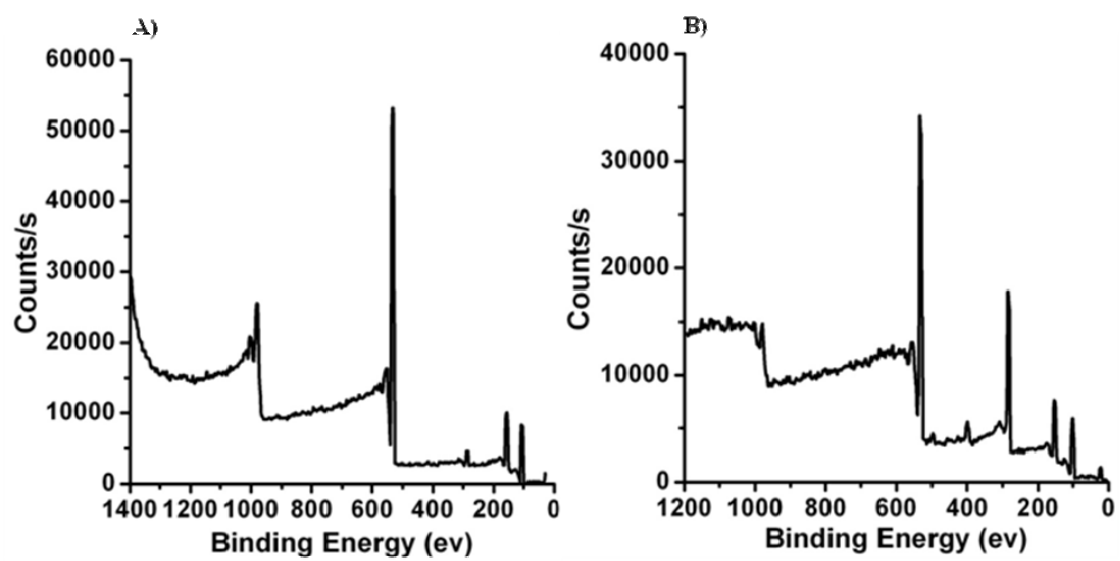

**Fig. S3** XPS spectra of (A) Au@SiO<sub>2</sub> and (B) 1.

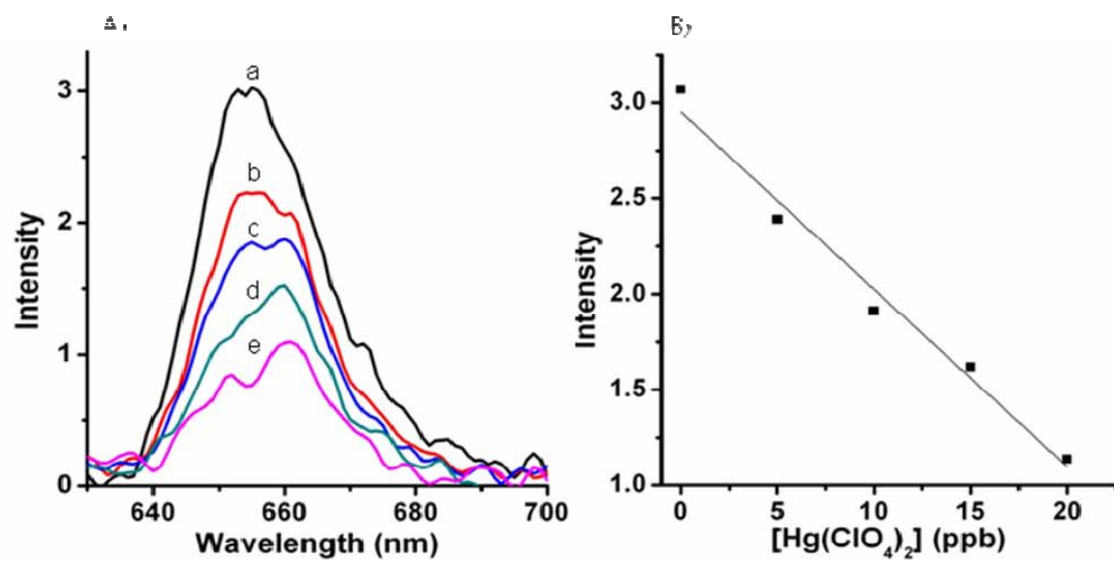

**Fig. S4** (A) Fluorescence spectra of **1** ( $0.1 \mu\text{M}$ ) upon addition of increasing  $\text{Hg}^{2+}$  concentrations (a: 0 ppb, b: 5.0ppb, c: 10 ppb, d) 15 ppb and e: 20 ppb) in aqueous solution. (B) Calibration curve of concentration of  $\text{Hg}^{2+}$  ion against fluorescence intensity of **1**.

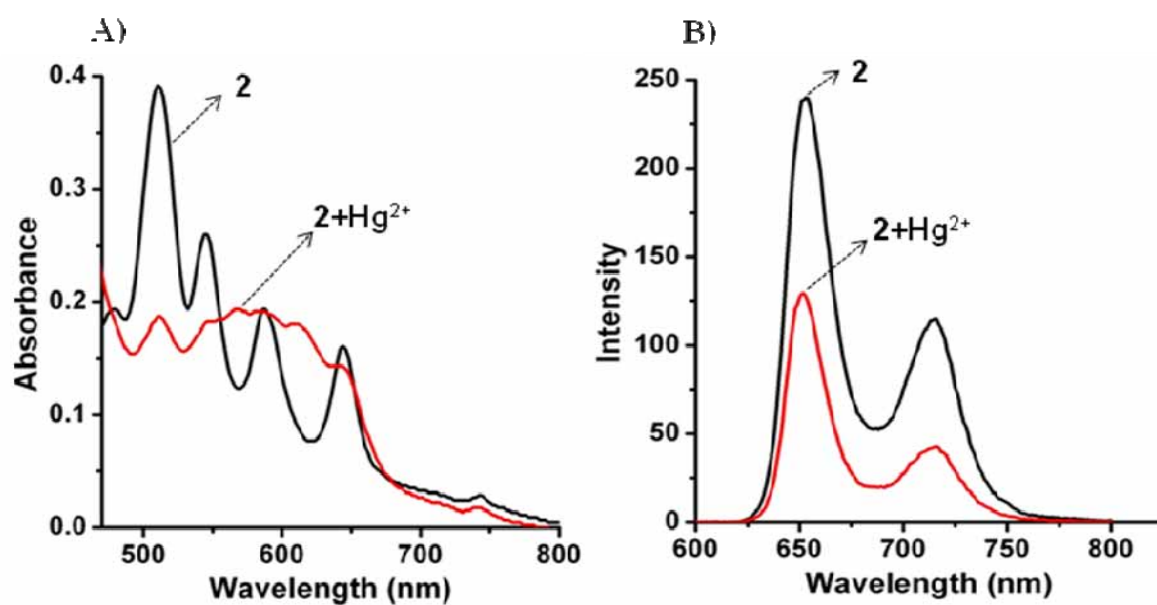

**Fig. S5** (A) UV-vis and (B) fluorescence spectra of **2** (10  $\mu\text{M}$ ) with and without  $\text{Hg}^{2+}$  ion (10 equiv) in acetonitrile.

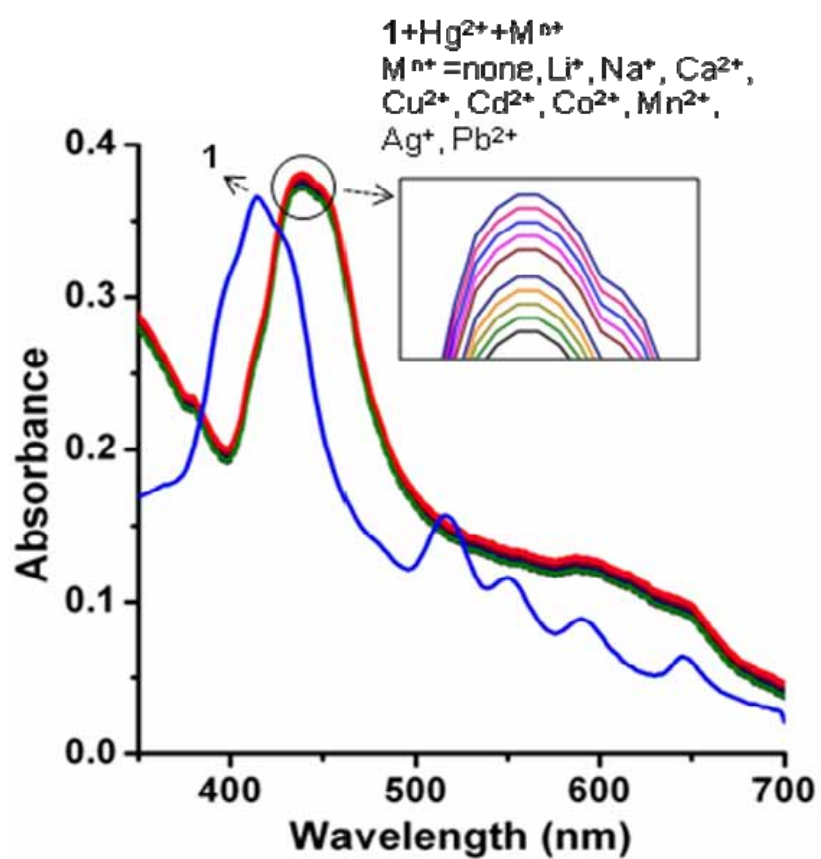

**Fig. S6** UV-vis spectra of **1** (10  $\mu\text{M}$ ) upon the addition of  $\text{Hg}^{2+}$  ion (10 equiv) in the presence of metal ions (10 equiv:  $\text{Li}^+$ ,  $\text{Na}^+$ ,  $\text{Ca}^{2+}$ ,  $\text{Cu}^{2+}$ ,  $\text{Cd}^{2+}$ ,  $\text{Co}^{2+}$ ,  $\text{Mn}^{2+}$ ,  $\text{Ag}^+$  or  $\text{Pb}^{2+}$ ) in aqueous solution at pH=7.4.



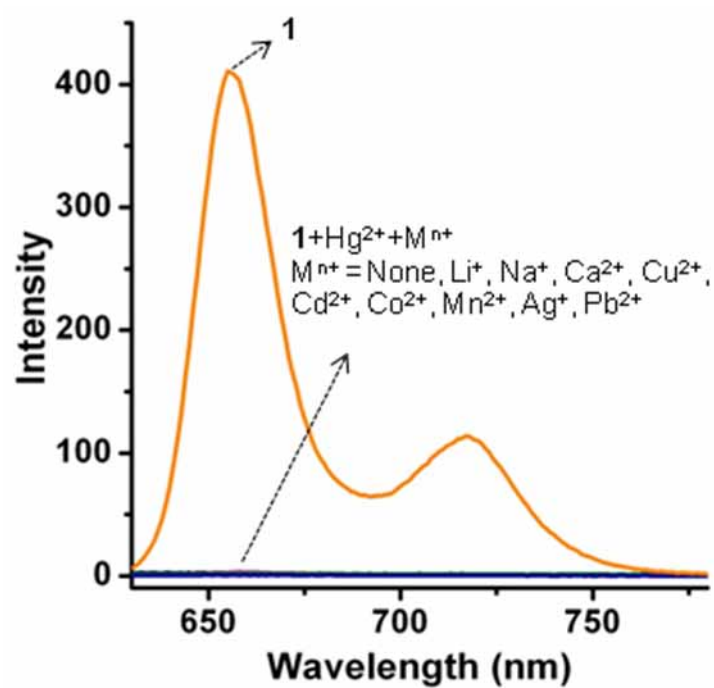

**Fig. S7** Fluorescence spectra of **1** (10  $\mu$ M) upon the addition of Hg<sup>2+</sup> ion (10 equiv) in the presence of metal ions (10 equiv: Li<sup>+</sup>, Na<sup>+</sup>, Ca<sup>2+</sup>, Cu<sup>2+</sup>, Cd<sup>2+</sup>, Co<sup>2+</sup>, Mn<sup>2+</sup>, Ag<sup>+</sup> or Pb<sup>2+</sup>) in aqueous solution at pH=7.4.

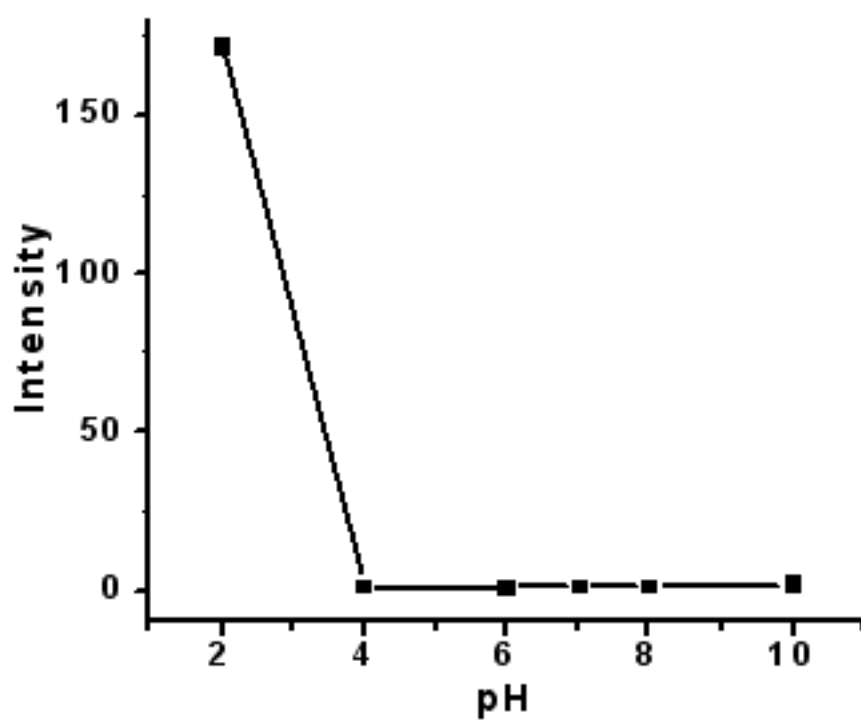

**Fig. S8** Plot of pH values against fluorescence intensity of **1** ( $10 \mu\text{M}$ ) with  $\text{Hg}^{2+}$  (10 equiv) in aqueous solution.
